# Supplementary material for: Rotating night shift work and adherence to unhealthy lifestyle in predicting risk of type 2 diabetes: results from two large US cohorts of female nurses
Source: PubMed Central journal article supplement — BMJ. 2018 Nov 21;363:k4641. doi: 10.1136/bmj.k4641 (PMC6247172; doi:10.1136/bmj.k4641), 2018-11-21
Supplement: shaz043817.ww1.pdf [file shaz043817.ww1.pdf]

**Supplementary Table A** Hazard ratios of type 2 diabetes according to individual lifestyle factor

|                                           | <b>NHS</b><br><b>HR (95% CI)</b> | <b>NHSII</b><br><b>HR (95% CI)</b> | <b>Pooled*</b><br><b>HR (95% CI)</b> |
|-------------------------------------------|----------------------------------|------------------------------------|--------------------------------------|
| <b>Cigarette smoking</b>                  |                                  |                                    |                                      |
| Never                                     | 1.00 (ref.)                      | 1.00 (ref.)                        | 1.00 (ref.)                          |
| Past                                      | 1.14 (1.08 to 1.21)              | 1.11 (1.04 to 1.18)                | 1.13 (1.08 to 1.18)                  |
| Current 1-14/day                          | 1.34 (1.16 to 1.54)              | 1.16 (1.01 to 1.32)                | 1.24 (1.08 to 1.43)                  |
| Current 15-24/day                         | 1.19 (1.02 to 1.39)              | 1.34 (1.17 to 1.55)                | 1.27 (1.13 to 1.43)                  |
| Current $\geq 25$ /day                    | 1.62 (1.34 to 1.95)              | 1.53 (1.27 to 1.85)                | 1.57 (1.38 to 1.80)                  |
| Current smoker vs. non-smoker             | 1.13 (1.03 to 1.24)              | 1.13 (1.04 to 1.24)                | 1.13 (1.06 to 1.21)                  |
| <b>Physical activity (hours/week)</b>     |                                  |                                    |                                      |
| 0                                         | 1.00 (ref.)                      | 1.00 (ref.)                        | 1.00 (ref.)                          |
| 0.1-0.9                                   | 0.94 (0.88 to 1.00)              | 0.92 (0.86 to 0.98)                | 0.93 (0.88 to 0.97)                  |
| 1.0-3.4                                   | 0.88 (0.82 to 0.95)              | 0.78 (0.73 to 0.84)                | 0.83 (0.74 to 0.94)                  |
| 3.5-5.9                                   | 0.81 (0.72 to 0.90)              | 0.75 (0.67 to 0.84)                | 0.78 (0.72 to 0.84)                  |
| $\geq 6$                                  | 0.67 (0.58 to 0.77)              | 0.80 (0.71 to 0.91)                | 0.73 (0.61 to 0.88)                  |
| <3.5 vs. $\geq 3.5$                       | 1.49 (1.36 to 1.63)              | 1.48 (1.36 to 1.60)                | 1.48 (1.40 to 1.57)                  |
| <b>Alternative healthy eating index</b>   |                                  |                                    |                                      |
| Fifth 1                                   | 1.00 (ref.)                      | 1.00 (ref.)                        | 1.00 (ref.)                          |
| Fifth 2                                   | 0.95 (0.88 to 1.03)              | 0.99 (0.92 to 1.07)                | 0.97 (0.92 to 1.03)                  |
| Fifth 3                                   | 0.93 (0.86 to 1.01)              | 0.88 (0.81 to 0.96)                | 0.91 (0.86 to 0.96)                  |
| Fifth 4                                   | 0.91 (0.84 to 0.99)              | 0.89 (0.82 to 0.97)                | 0.9 (0.85 to 0.96)                   |
| Fifth 5                                   | 0.80 (0.73 to 0.87)              | 0.83 (0.76 to 0.91)                | 0.81 (0.76 to 0.87)                  |
| Lower three-fifths vs. upper two-fifths   | 1.16 (1.10 to 1.23)              | 1.24 (1.17 to 1.32)                | 1.20 (1.13 to 1.28)                  |
| <b>Body mass index (kg/m<sup>2</sup>)</b> |                                  |                                    |                                      |
| 18.5-22.9                                 | 1.00 (ref.)                      | 1.00 (ref.)                        | 1.00 (ref.)                          |
| 23-24.9                                   | 1.87 (1.62 to 2.17)              | 2.27 (1.81 to 2.85)                | 2.02 (1.68 to 2.43)                  |
| 25-29.9                                   | 4.47 (3.97 to 5.04)              | 7.30 (6.08 to 8.76)                | 5.68 (3.52 to 9.18)                  |
| 30-34.9                                   | 9.71 (8.59 to 10.9)              | 21.4 (17.9 to 25.6)                | 14.4 (6.62 to 31.2)                  |
| $\geq 35$                                 | 16.2 (14.3 to 18.4)              | 47.3 (39.6 to 56.5)                | 27.6 (9.67 to 78.9)                  |
| $\geq 25$ vs. <25                         | 5.13 (4.74 to 5.55)              | 12.4 (11.1 to 13.9)                | 7.98 (3.35 to 19.0)                  |
| <b>Number of high-risk factors</b>        |                                  |                                    |                                      |
| $\leq 1$                                  | 1.00 (ref.)                      | 1.00 (ref.)                        | 1.00 (ref.)                          |
| <b>2</b>                                  | 2.43 (2.20 to 2.68)              | 3.01 (2.71 to 3.36)                | 2.70 (2.19 to 3.34)                  |
| $\geq 3$                                  | 4.42 (4.02 to 4.86)              | 6.58 (5.93 to 7.29)                | 5.39 (3.65 to 7.95)                  |

Models were adjusted for age, calendar year, ethnicity (White, African-American, Hispanic, or Asian), marital status (married, divorced/separate/single, widowed); living status (alone or not), family history of diabetes (yes/no), menopausal status (pre or postmenopausal (never, past or current menopausal hormone use), oral contraceptives use (never, past or current use (NHS II only)), alcohol drinking (g/d: 0, 0.1-4.9, 5.0-14.9, 15.0-19.9, 20.0-29.9, and  $\geq 30$ ), and total energy intake (quintile).

All covariates, except ethnicity and family history of diabetes, were time-varying.

Individual lifestyle factors were mutually adjusted for each other.

\*Results were pooled with the use of the random effects model.

**Supplementary Table B** Hazard ratios of type 2 diabetes according to joint categories of rotating night shift work duration and unhealthy lifestyle score

| Unhealthy Lifestyle Score <sup>‡</sup> | Duration of rotating night shift work (years) |                     |                     |                     |                     |
|----------------------------------------|-----------------------------------------------|---------------------|---------------------|---------------------|---------------------|
|                                        | Never                                         | <5                  | 5-9                 | ≥10                 |                     |
| <b>NHS (1988-2012)</b>                 |                                               |                     |                     |                     |                     |
| <b>≤1</b>                              | Cases/ Person-years (PY)                      | 176/132865          | 224/137979          | 38/18550            | 69/26774            |
|                                        | Crude Incidence/10 <sup>5</sup> PY            | 132                 | 162                 | 205                 | 258                 |
|                                        | Hazard Ratio (95%CI)*                         | 1.00 (ref.)         | 1.22 (1.00 to 1.49) | 1.45 (1.02 to 2.06) | 1.76 (1.33 to 2.33) |
|                                        | Hazard Ratio (95%CI) <sup>#</sup>             | 1.00 (ref.)         | 1.21 (1.00 to 1.48) | 1.40 (0.98 to 1.99) | 1.71 (1.29 to 2.26) |
| <b>2</b>                               | Cases/ Person-years (PY)                      | 686/182834          | 743/183295          | 142/28888           | 260/43845           |
|                                        | Crude Incidence/10 <sup>5</sup> PY            | 375                 | 405                 | 492                 | 593                 |
|                                        | Hazard Ratio (95%CI)*                         | 2.68 (2.27 to 3.16) | 2.83 (2.40 to 3.34) | 3.26 (2.61 to 4.06) | 3.81 (3.14 to 4.61) |
|                                        | Hazard Ratio (95%CI) <sup>#</sup>             | 2.39 (2.02 to 2.82) | 2.51 (2.13 to 2.96) | 2.84 (2.28 to 3.55) | 3.25 (2.68 to 3.94) |
| <b>≥3</b>                              | Cases/ Person-years (PY)                      | 1206/154419         | 1233/156282         | 225/26525           | 472/47341           |
|                                        | Crude Incidence/10 <sup>5</sup> PY            | 781                 | 789                 | 848                 | 997                 |
|                                        | Hazard Ratio (95%CI)*                         | 5.12 (4.37 to 6.01) | 5.14 (4.39 to 6.03) | 5.45 (4.47 to 6.65) | 6.12 (5.14 to 7.28) |
|                                        | Hazard Ratio (95%CI) <sup>#</sup>             | 4.13 (3.52 to 4.85) | 4.17 (3.56 to 4.89) | 4.39 (3.60 to 5.35) | 4.88 (4.10 to 5.81) |
| <b>NHS2 (1991-2013)</b>                |                                               |                     |                     |                     |                     |
| <b>≤1</b>                              | Cases/ Person-years (PY)                      | 116/179921          | 205/292127          | 44/59440            | 54/39807            |
|                                        | Crude Incidence/10 <sup>5</sup> PY            | 64                  | 70                  | 74                  | 136                 |
|                                        | Hazard Ratio (95%CI)*                         | 1.00 (ref.)         | 1.1 (0.88 to 1.38)  | 1.12 (0.79 to 1.59) | 1.7 (1.23 to 2.35)  |
|                                        | Hazard Ratio (95%CI) <sup>#</sup>             | 1.00 (ref.)         | 1.1 (0.88 to 1.39)  | 1.10 (0.78 to 1.56) | 1.67 (1.21 to 2.30) |
| <b>2</b>                               | Cases/ Person-years (PY)                      | 424/213370          | 750/335409          | 215/73009           | 244/53155           |
|                                        | Crude Incidence/10 <sup>5</sup> PY            | 199                 | 224                 | 294                 | 459                 |
|                                        | Hazard Ratio (95%CI)*                         | 2.88 (2.34 to 3.53) | 3.21 (2.64 to 3.90) | 4.01 (3.20 to 5.03) | 5.14 (4.12 to 6.41) |

|                           |                                    |                     |                     |                     |                     |
|---------------------------|------------------------------------|---------------------|---------------------|---------------------|---------------------|
|                           | Hazard Ratio (95%CI) <sup>#</sup>  | 2.45 (1.99 to 3.01) | 2.69 (2.21 to 3.27) | 3.27 (2.61 to 4.10) | 4.12 (3.30 to 5.14) |
| <b>≥3</b>                 | Cases/ Person-years (PY)           | 833/153040          | 1628/259099         | 474/65569           | 454/54774           |
|                           | Crude Incidence/10 <sup>5</sup> PY | 544                 | 628                 | 723                 | 829                 |
|                           | Hazard Ratio (95%CI) <sup>*</sup>  | 6.57 (5.41 to 7.98) | 7.46 (6.18 to 9.01) | 8.24 (6.72 to 10.1) | 8.19 (6.67 to 10.1) |
|                           | Hazard Ratio (95%CI) <sup>#</sup>  | 4.64 (3.82 to 5.64) | 5.25 (4.34 to 6.35) | 5.83 (4.75 to 7.15) | 5.72 (4.66 to 7.03) |
| <b>Pooled<sup>†</sup></b> |                                    |                     |                     |                     |                     |
| <b>≤1</b>                 | Hazard Ratio (95%CI) <sup>*</sup>  | 1.00 (ref.)         | 1.17 (1.01 to 1.36) | 1.28 (0.99 to 1.64) | 1.73 (1.40 to 2.14) |
|                           | Hazard Ratio (95%CI) <sup>#</sup>  | 1.00 (ref.)         | 1.17 (1.00 to 1.35) | 1.24 (0.97 to 1.59) | 1.69 (1.37 to 2.09) |
| <b>2</b>                  | Hazard Ratio (95%CI) <sup>*</sup>  | 2.76 (2.42 to 3.14) | 2.98 (2.63 to 3.38) | 3.61 (2.94 to 4.43) | 4.40 (3.28 to 5.90) |
|                           | Hazard Ratio (95%CI) <sup>#</sup>  | 2.41 (2.12 to 2.74) | 2.59 (2.28 to 2.93) | 3.04 (2.60 to 3.57) | 3.64 (2.89 to 4.58) |
| <b>≥3</b>                 | Hazard Ratio (95%CI) <sup>*</sup>  | 5.77 (4.52 to 7.35) | 6.17 (4.29 to 8.89) | 6.70 (4.47 to 10.0) | 7.04 (5.29 to 9.37) |
|                           | Hazard Ratio (95%CI) <sup>#</sup>  | 4.33 (3.83 to 4.90) | 4.65 (3.72 to 5.83) | 5.05 (3.83 to 6.67) | 5.23 (4.48 to 6.11) |

CI=confidence interval; PY=person-year.

\*Adjusted for age, calendar year, ethnicity (White, African-American, Hispanic, or Asian), marital status (married, divorced/separate/single, widowed); living status (alone or not), family history of diabetes (yes/no), menopausal status (pre or postmenopausal (never, past or current menopausal hormone use), oral contraceptives use (never, past or current use (NHS II only)), alcohol drinking (g/d: 0, 0.1-4.9, 5.0-14.9, 15.0-19.9, 20.0-29.9, and ≥30), and total energy intake (quintile).

<sup>#</sup>Further adjusted for prevalent hypertension and hyperlipidemia, and medication use for high blood pressure and lipid levels.

All covariates, except ethnicity and family history of diabetes, were time-varying.

<sup>†</sup>Results were pooled with the use of the random effects model.

<sup>‡</sup>Unhealthy lifestyles include currently smoking, exercise <30 min/d at moderate intensity, diet in bottom three fifths of Alternate Healthy Eating Index score, and body mass index ≥25 kg/m<sup>2</sup>.

**Supplementary Table C** Attributing effects to additive interaction between rotating night shift work and weighed lifestyle score on risk of type 2 diabetes

|                                                 | Nurses' Health Study | Nurses' Health Study II | Pooled results    | P for heterogeneity <sup>†</sup> |
|-------------------------------------------------|----------------------|-------------------------|-------------------|----------------------------------|
| <b>Main effects</b>                             |                      |                         |                   |                                  |
| Rotating night shift work duration (per 5-year) | 1.17 (1.08, 1.27)    | 1.10 (0.96, 1.27)       | 1.15 (1.07, 1.24) | 0.496                            |
| Unhealthy lifestyle <sup>‡</sup> (per score)    | 1.81 (1.75, 1.87)    | 2.25 (2.15, 2.35)       | 2.02 (1.63, 2.50) | <0.001                           |
| Joint effect                                    | 2.06 (1.98, 2.14)    | 2.48 (2.34, 2.61)       | 2.26 (1.89, 2.70) | <0.001                           |
| Relative excess risk due to interaction         |                      |                         |                   |                                  |
| Relative excess risk due to interaction         | 0.08 (0.05, 0.12)    | 0.12 (0.02, 0.23)       | 0.09 (0.06, 0.13) | 0.578                            |
| P value                                         | <0.001               | 0.026                   | <0.001            | /                                |
| Attributable proportion, %                      |                      |                         |                   |                                  |
| Rotating night shift work                       | 15.9 (9.3, 22.6)     | 7.1 (-2.1, 16.2)        | 15.8 (10.2, 24.5) | 0.668                            |
| Unhealthy lifestyle <sup>‡</sup>                | 76.2 (71.5, 80.9)    | 84.5 (78.6, 90.4)       | 80.2 (72.5, 88.7) | 0.031                            |
| Additive interaction                            | 7.8 (5.7, 9.9)       | 8.4 (2.9, 13.9)         | 7.9 (6.1, 10.2)   | 0.858                            |

CI=confidence interval; PY=person-year.

\*Adjusted for age, calendar year, ethnicity (White, African-American, Hispanic, or Asian), marital status (married, divorced/separate/single, widowed); living status (alone or not), family history of diabetes (yes/no), menopausal status (pre or postmenopausal (never, past or current menopausal hormone use), oral contraceptives use (never, past or current use (NHS II only)), alcohol drinking (g/d: 0, 0.1-4.9, 5.0-14.9, 15.0-19.9, 20.0-29.9 and  $\geq 30$ ), and total energy intake (quintile).

#Further adjusted for prevalent hypertension and hyperlipidemia, and medication use for high blood pressure and lipid levels.

All covariates, except ethnicity and family history of diabetes, were time-varying.

<sup>†</sup>Results were pooled with the use of the random effects model.

<sup>‡</sup>Unhealthy lifestyles score was created by assigning weights to each unhealthy lifestyle factor (currently smoking, exercise <30 min/d at moderate intensity, diet in bottom three fifths of the Alternate Healthy Eating Index score, and body mass index  $\geq 25$  kg/m<sup>2</sup>), based on the coefficients from multivariable regression models include.



**Supplementary Figure B** Joint association of rotating night shift work and unhealthy lifestyle with risk of symptomatic type 2 diabetes. A: Pooled multivariable hazard ratio of symptomatic type 2 diabetes according to joint categories of rotating night shift work duration and number of unhealthy lifestyle factors. B: Multivariable hazard ratio of symptomatic type 2 diabetes attributable to rotating night shift work, to unhealthy lifestyle and to their interaction.

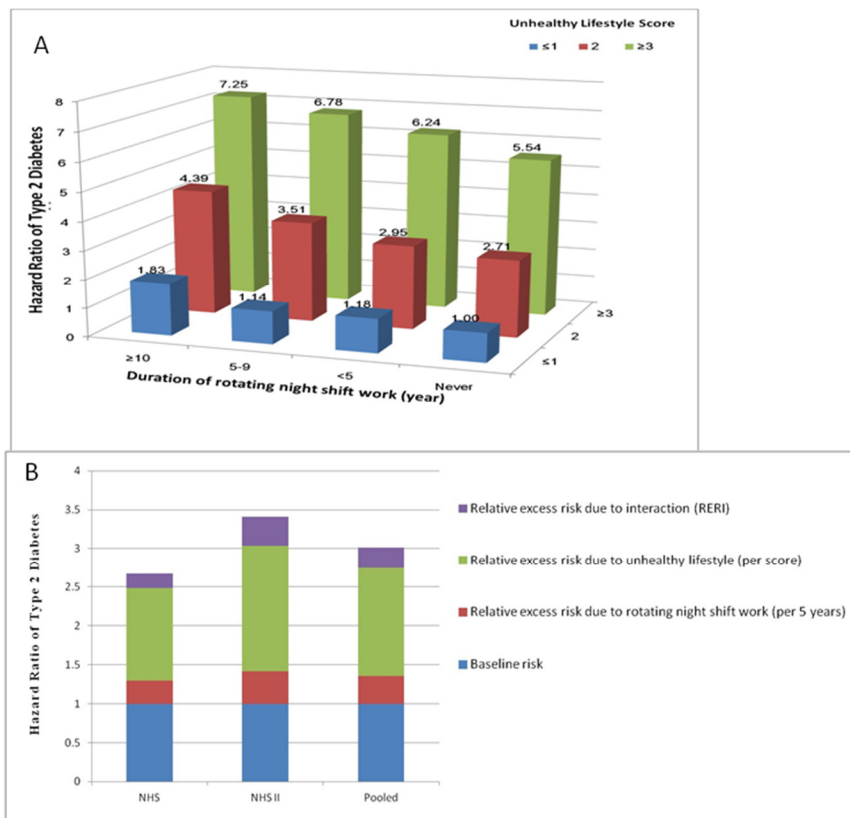

Multivariable model adjusted for age, calendar year, ethnicity (White, African-American, Hispanic, or Asian), marital status (married, divorced/separate/single, widowed); living status (alone or not), family history of diabetes (yes/no), menopausal status (pre or postmenopausal (never, past or current menopausal hormone use), oral contraceptives use (never, past or current use (NHS II only)), alcohol drinking (g/d: 0, 0.1-4.9, 5.0-14.9, 15.0-19.9, 20.0-29.9 and  $\geq 30$ ), and total energy intake (quintile).

All covariates, except ethnicity and family history of diabetes, were time-varying.

Unhealthy lifestyles include currently smoking, exercise  $< 30$  min/d at moderate intensity, diet in bottom three fifths of Alternate Healthy Eating Index score, and body mass index  $\geq 25$ .

Results were pooled with the use of the random effects model.

**Supplementary Figure C** Joint association of rotating night shift work and baseline unhealthy lifestyle with risk of type 2 diabetes. A: Pooled multivariable hazard ratio of type 2 diabetes according to joint categories of rotating night shift work duration and number of unhealthy lifestyle factors. B: Multivariable hazard ratio of type 2 diabetes attributable to rotating night shift work, to unhealthy lifestyle and to their interaction.

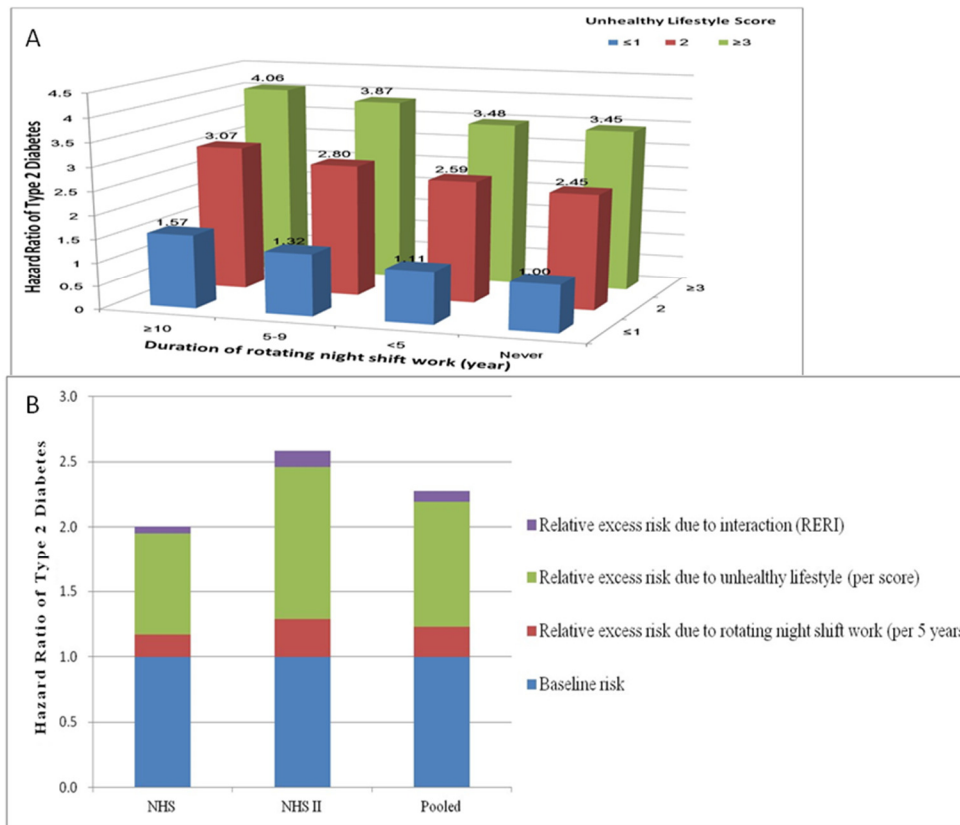

Multivariable model adjusted for age, calendar year, ethnicity (White, African-American, Hispanic, or Asian), marital status (married, divorced/separate/single, widowed); living status (alone or not), family history of diabetes (yes/no), menopausal status (pre or postmenopausal (never, past or current menopausal hormone use), oral contraceptives use (never, past or current use (NHS II only)), alcohol drinking (g/d: 0, 0.1-4.9, 5.0-14.9, 15.0-19.9, 20.0-29.9 and  $\geq 30$ ), and total energy intake (quintile).

All covariates, except ethnicity and family history of diabetes, were time-varying.

Unhealthy lifestyles include currently smoking, exercise  $< 30$  min/d at moderate intensity, diet in bottom three fifths of Alternate Healthy Eating Index score, and body mass index  $\geq 25$ .

Results were pooled with the use of the random effects model.

**Supplementary Figure D** Pooled multivariable hazard ratio of type 2 diabetes according to joint category of rotating night shift work and unhealthy lifestyle factors among overall (A), BMI<25 (B) and BMI ≥25(C) populations.

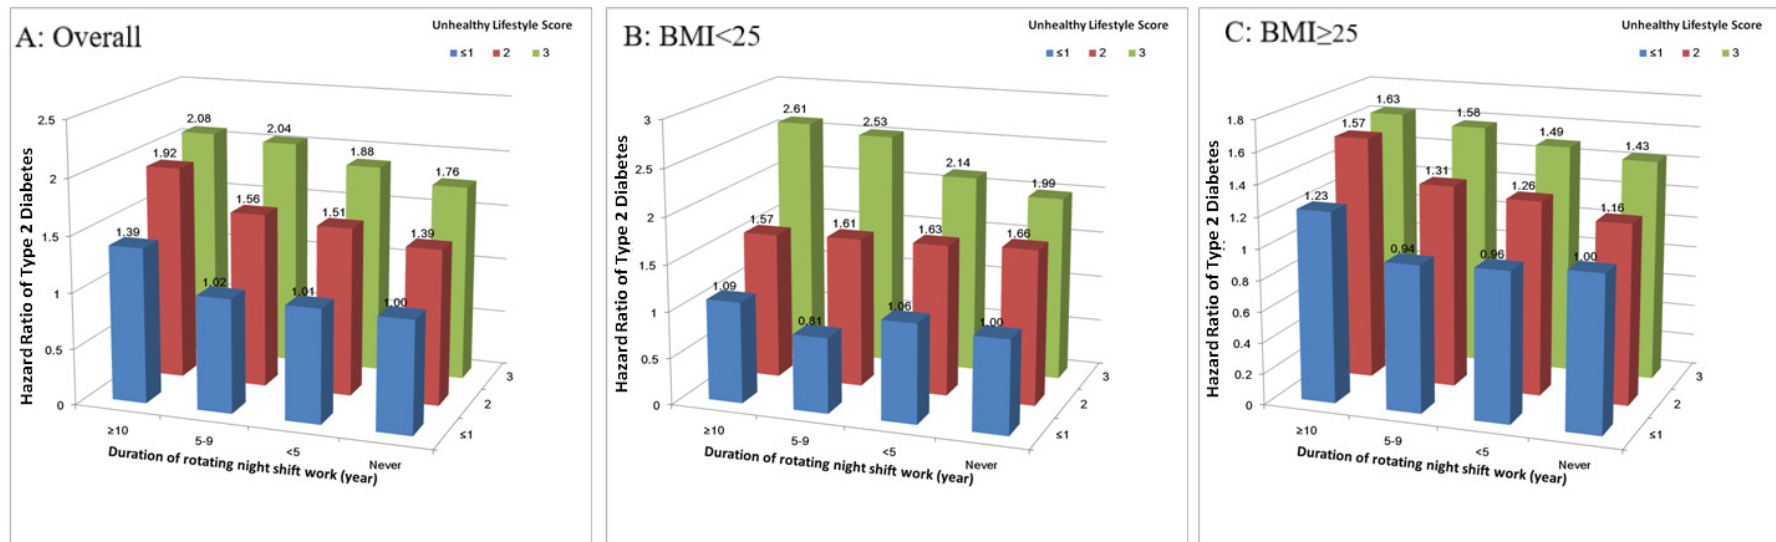

Multivariable model adjusted for age, calendar year, ethnicity (White, African-American, Hispanic, or Asian), marital status (married, divorced/separate/single, widowed); living status (alone or not), family history of diabetes (yes/no), menopausal status (pre or postmenopausal (never, past or current menopausal hormone use), oral contraceptives use (never, past or current use (NHS II only)), alcohol drinking (g/d: 0, 0.1-4.9, 5.0-14.9, 15.0-19.9, 20.0-29.9 and ≥30), total energy intake (quintile), and baseline BMI (continuous).

All covariates, except ethnicity and family history of diabetes, were time-varying.

Unhealthy lifestyles include currently smoking, exercise <30 min/d at moderate intensity, and diet in bottom three fifths of Alternate Healthy Eating Index score.

Results were pooled with the use of the random effects model.
